# Supplementary material for: Deletion of the nuclear receptor RORα in macrophages does not modify the development of obesity, insulin resistance and NASH
Source: PubMed Central journal article supplement (PMC7713245; doi:10.1038/s41598-020-77858-6), 2020-12-03
Supplement: 41598_2020_77858_MOESM1_ESM.pdf [file 41598_2020_77858_MOESM1_ESM.pdf]

## **Deletion of the nuclear receptor ROR $\alpha$ in macrophages does not modify the development of obesity, insulin resistance and NASH**

Laurent L'homme<sup>1,2</sup>, Benan Pelin Sermikli<sup>1,2</sup>, Olivier Molendi-Coste<sup>1,2</sup>, Sébastien Fleury<sup>1</sup>, Sandrine Quemener<sup>1</sup>, Mathilde Le Maître<sup>1</sup>, Marie-Laure Joseph<sup>1</sup>, Laurent Pineau<sup>1</sup>, Christian Duhem<sup>1</sup>, Barbara Gross<sup>1</sup>, Emmanuelle Vallez<sup>1</sup>, Anne Tailleux<sup>1</sup>, Bart Staels<sup>1,3</sup>, David Dombrowicz<sup>1,3,\*</sup>

<sup>1</sup>Univ. Lille, Inserm, CHU Lille, Institut Pasteur de Lille, U1011-EGID, F-59000 Lille, France

<sup>2</sup>These authors contributed equally

<sup>3</sup>These authors shared senior authorship

\*Correspondence : [david.dombrowicz@pasteur-lille.fr](mailto:david.dombrowicz@pasteur-lille.fr)

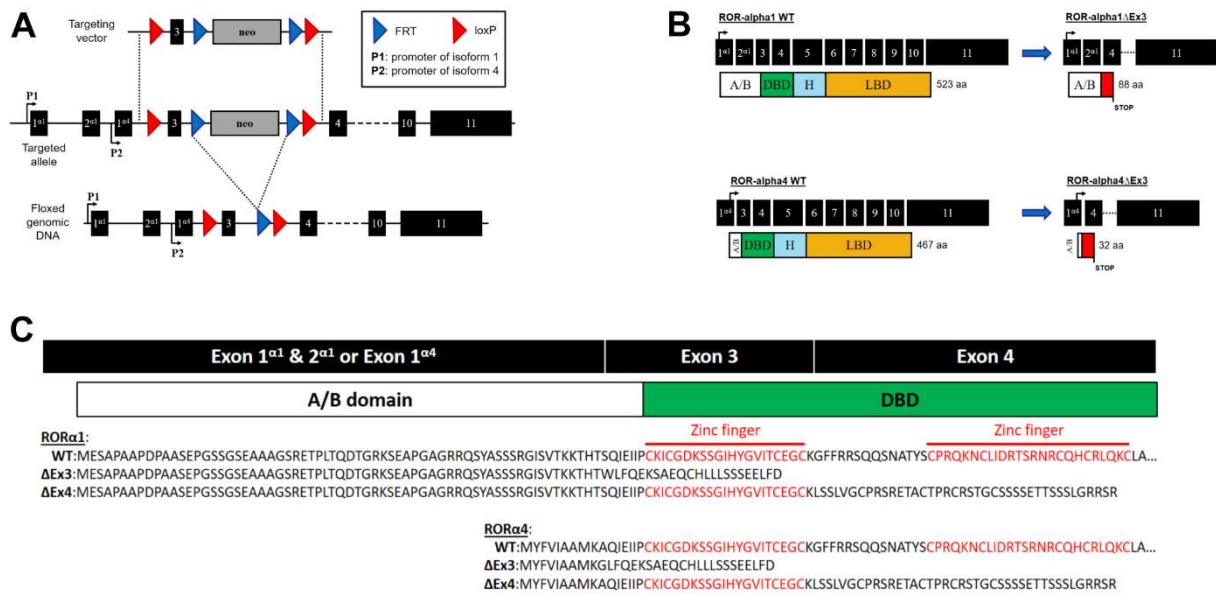

**Figure S1:** Characterization of ROR $\alpha$  MKO mice (Related to Figure 1).

**(A)** Schematic representation of the strategy to target exon 3 of *Rora*. **(B)** mRNA structures of ROR $\alpha$ 1 and ROR $\alpha$ 4 and the resulting proteins in both WT and MKO ( $\Delta$ Ex3) mice. Exons are represented in black. Protein predictions are illustrated below mRNA and functional domains are indicated with colors. **(C)** Comparison of *Rora* exon 3 and exon 4 deletion on protein translation. Zinc finger motifs are indicated in red. Protein predictions were generated with Translate tool from ExPASy (<https://web.expasy.org/translate>) by using GenBank sequences for ROR $\alpha$ 1 (NM\_013646.2) and ROR $\alpha$ 4 (NM\_001289916.1).

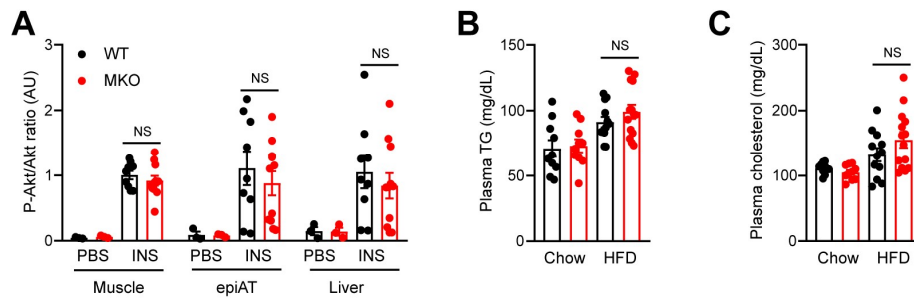

**Figure S2:** Effect of ROR $\alpha$  deletion in macrophages on HFD-induced obesity and IR (Related to Figure 2).

Ten weeks old WT and MKO mice were fed with either a chow or a HFD for 12 weeks. **(A)** Quantification of western blot for phospho-Akt in skeletal muscle, epididymal adipose tissue (epiAT) and liver. Quantification were performed with the Image studio Lite Version 4.0.21 software (LI-COR, <https://www.licor.com/bio/image-studio-lite/>) **(B)** Plasma triglyceride (TG). **(C)** Plasma cholesterol. Data are shown as mean  $\pm$  SEM. 2-way ANOVA followed by Sidak's multiple comparisons test was performed. All statistical analyses were carried out using GraphPad Prism 8 for Windows (GraphPad Software). n=10-15 mice per group. NS: Not significant; AU: Arbitrary unit.

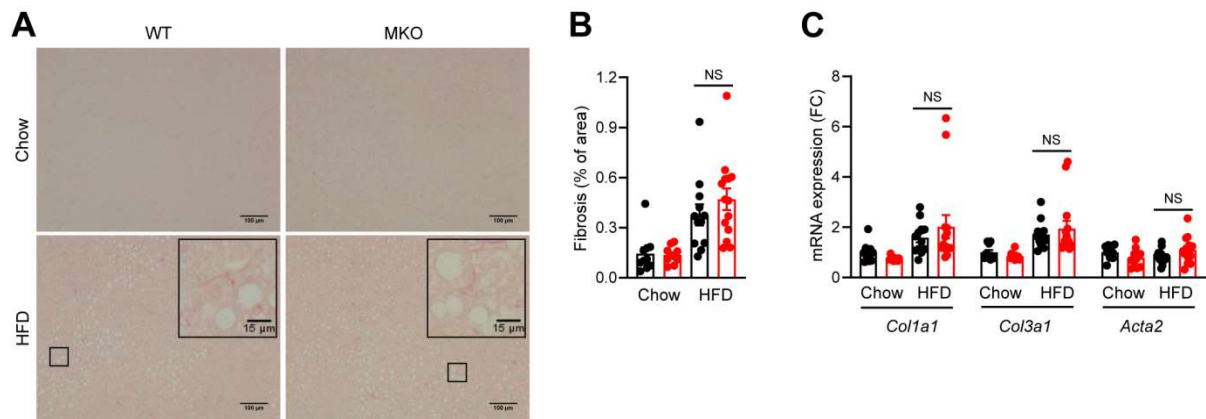

**Figure S3:** Effect of ROR $\alpha$  deletion in macrophages on HFD-induced fibrosis (Related to Figure 3).

Ten weeks old WT and MKO mice were fed with either a chow or a HFD for 12 weeks (**A-B**) Sirius red staining of liver sections (**A**) and quantification of fibrosis (**B**). Images were acquired on an Eclipse Ti-U microscope (Nikon) and quantified with Image J version 1.51j8 software (NIH, <https://imagej.nih.gov/ij/>). (**C**) mRNA expression levels measured by RT-qPCR for *Col1a1*, *Col3a1*, and *Acta2* genes in the liver. Data are shown as mean  $\pm$  SEM. 2-way ANOVA followed by Sidak's multiple comparisons test was performed. All statistical analyses were carried out using GraphPad Prism 8 for Windows (GraphPad Software). n=10-15 mice per group. NS: Not significant; FC: Fold Change

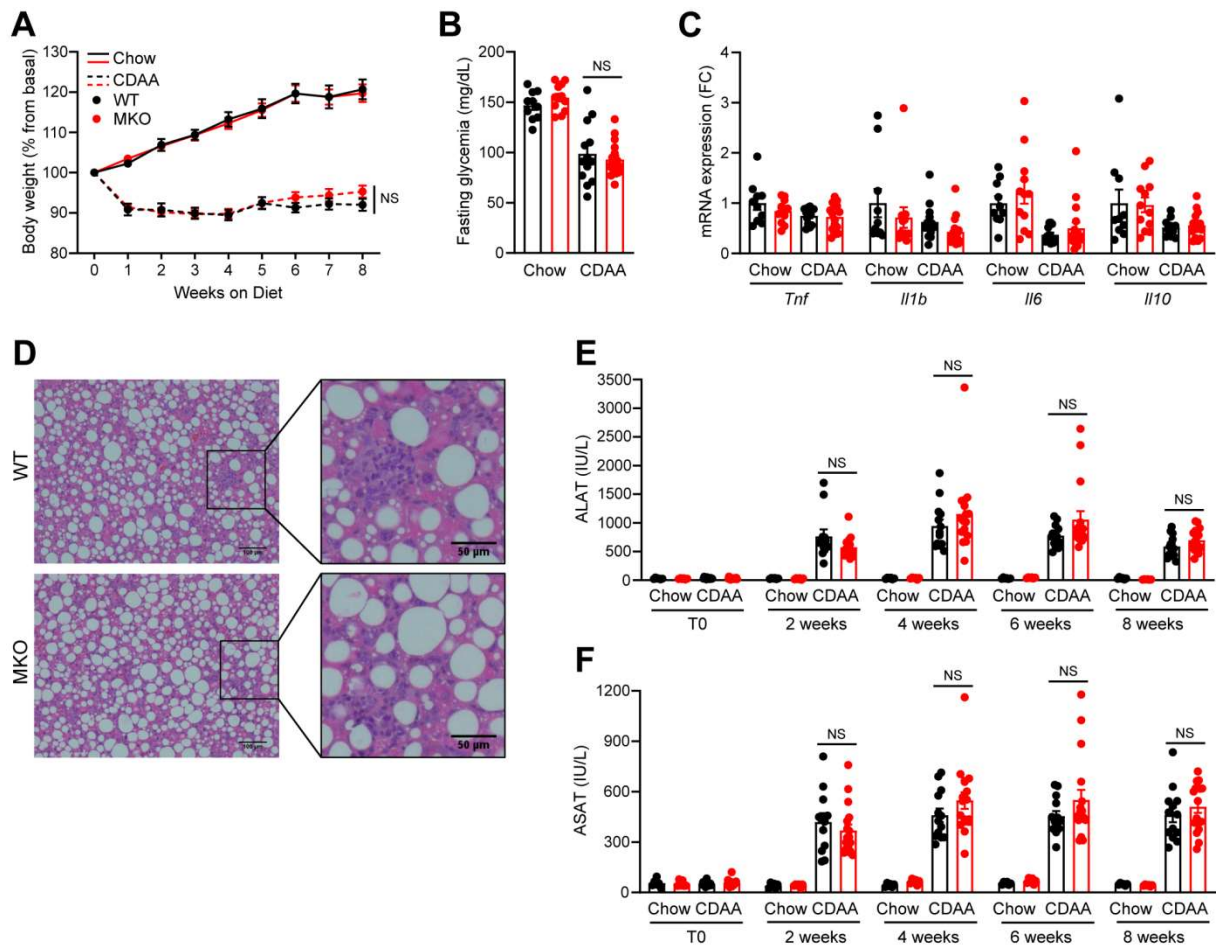

**Figure S4:** Effect of ROR $\alpha$  deletion in macrophages upon CDAA diet feeding (Related to Figure 4).

Ten weeks old WT and MKO mice were fed with either a chow or a CDAA diet for 8 weeks. **(A)** Body weight gain. **(B)** Fasting glycemia. **(C)** mRNA expression levels measured by RT-qPCR for *Tnf*, *Il1b*, *Il6*, and *Il10* genes in epiAT. **(D)** Hematoxylin & Eosin staining of liver sections. Images were acquired on an Eclipse Ti-U microscope (Nikon) and prepared with Image J version 1.51j8 software (NIH, <https://imagej.nih.gov/ij/>). **(E-F)** Kinetics of plasma transaminases activity. Data are shown as mean  $\pm$  SEM. 2-way ANOVA followed by Sidak's multiple comparisons test was performed. All statistical analyses were carried out using GraphPad Prism 8 for Windows (GraphPad Software). n=10-17 mice per group. NS: Not significant; FC: Fold Change.

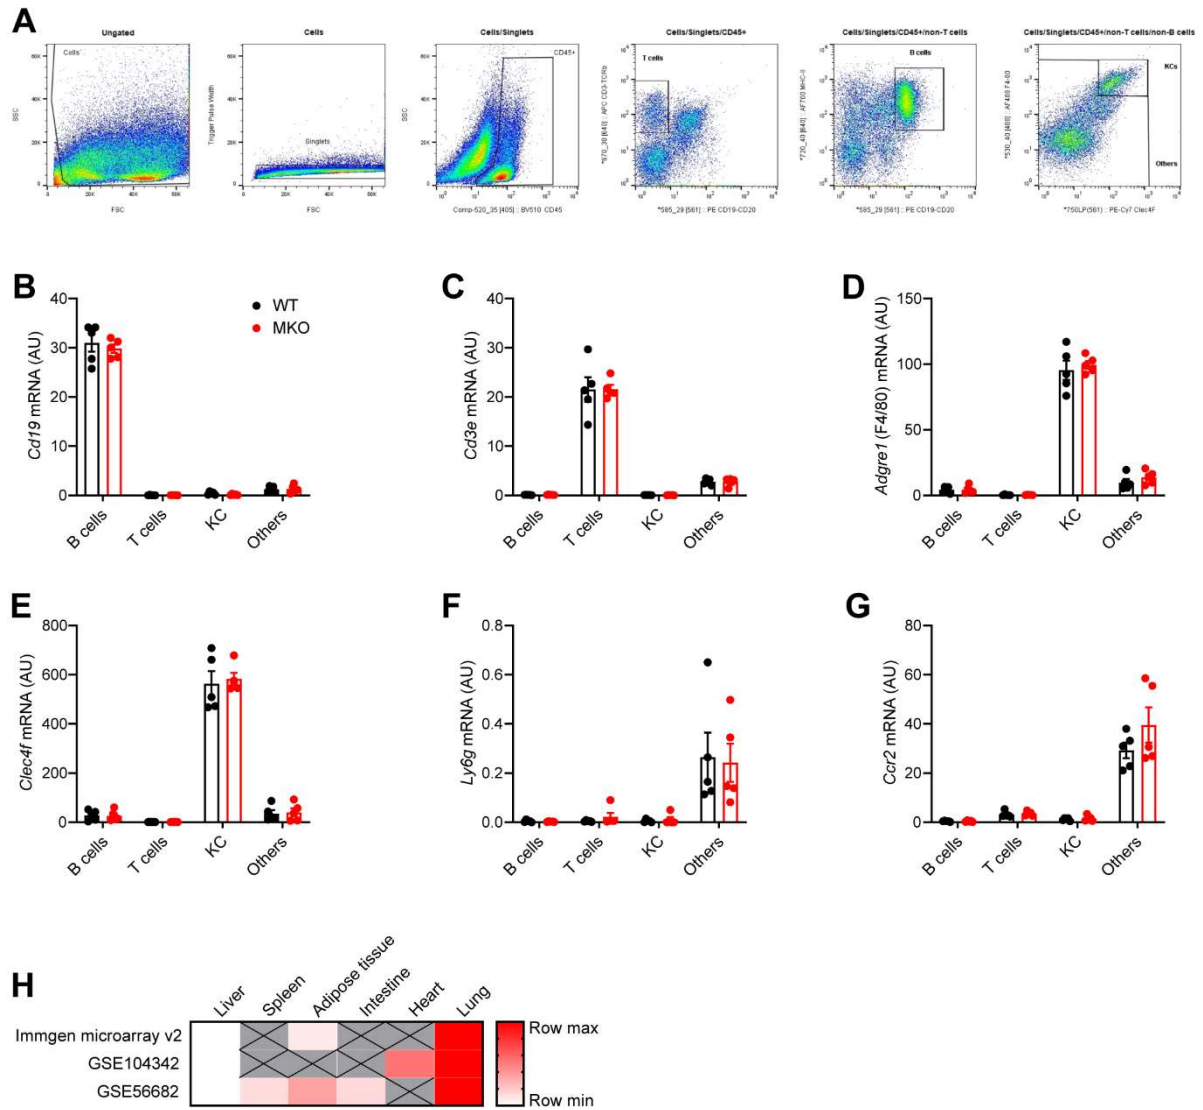

**Figure S5:** Quality control of Kupffer Cells (KCs) sorting (Related to Figure 5).

(A) Representative gating strategy for cell sorting of T cells, B cells, KCs and other cells (CD45<sup>+</sup> non-T cells, -B cells and -KCs) from liver. (B-G) mRNA expression levels measured by RT-qPCR for the *Cd19* (B), *Cd3e* (C), *Adgre1* (D), *Clec4f* (E), *Ly6g* (F) and *Ccr2* (G) genes in B cells, T cells, KCs and Others sorted from the liver of WT and MKO mice. (H) Heatmap of *Rora* expression in different macrophage populations from public databases. Data are shown as mean  $\pm$  SEM. n=5 mice per genotype. AU: Arbitrary unit.

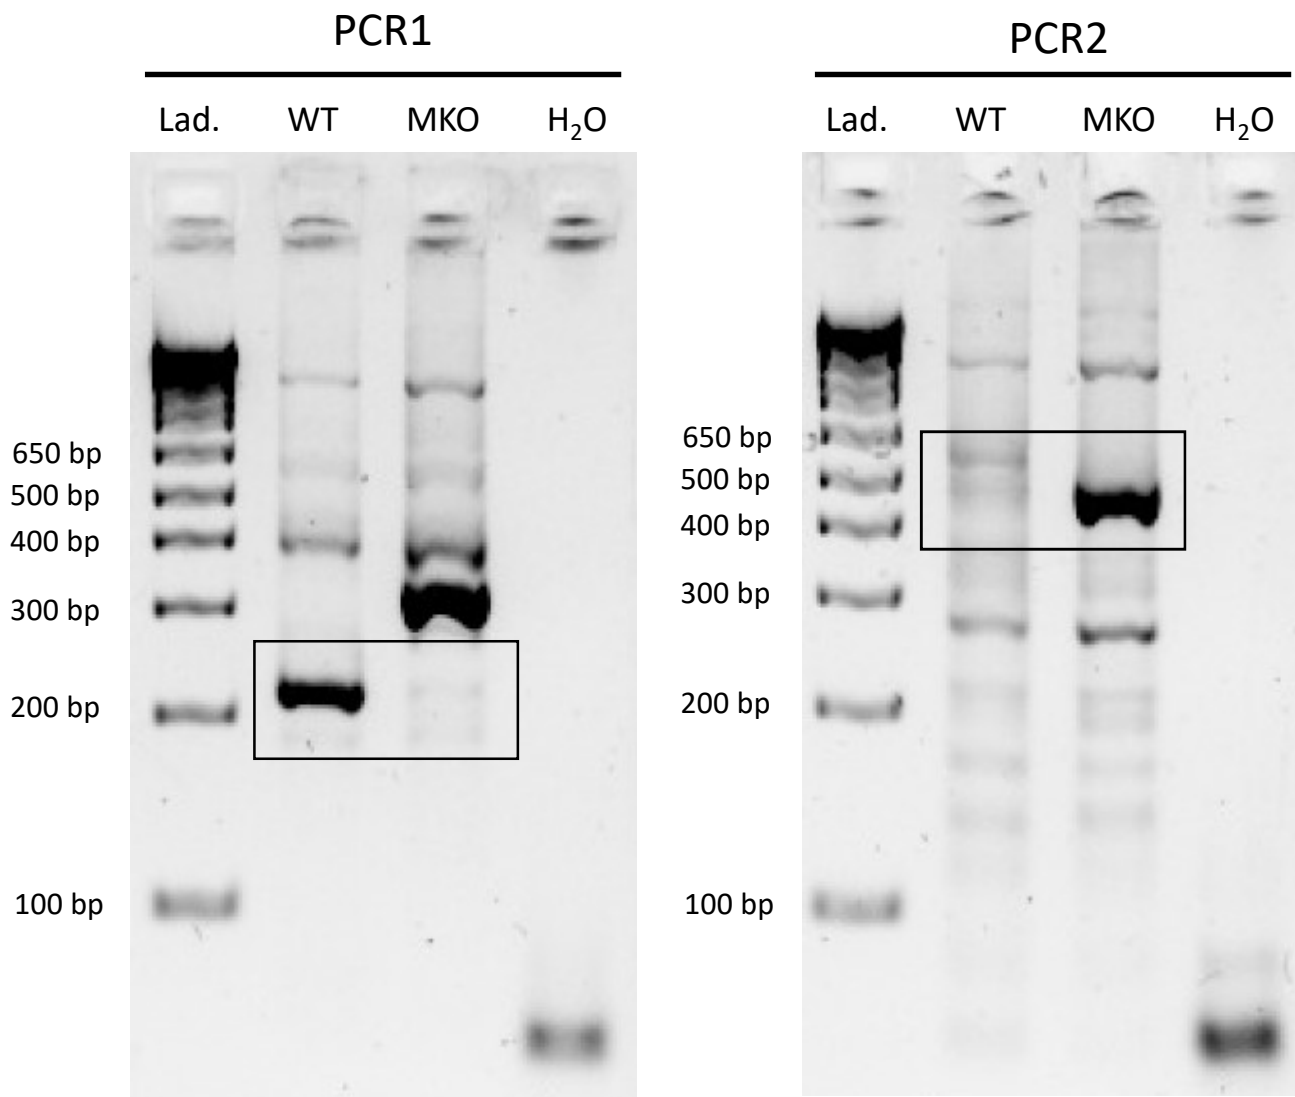

**Figure S6:** Uncropped agarose gel (related to Fig. 1B)

Lad., DNA Ladder.

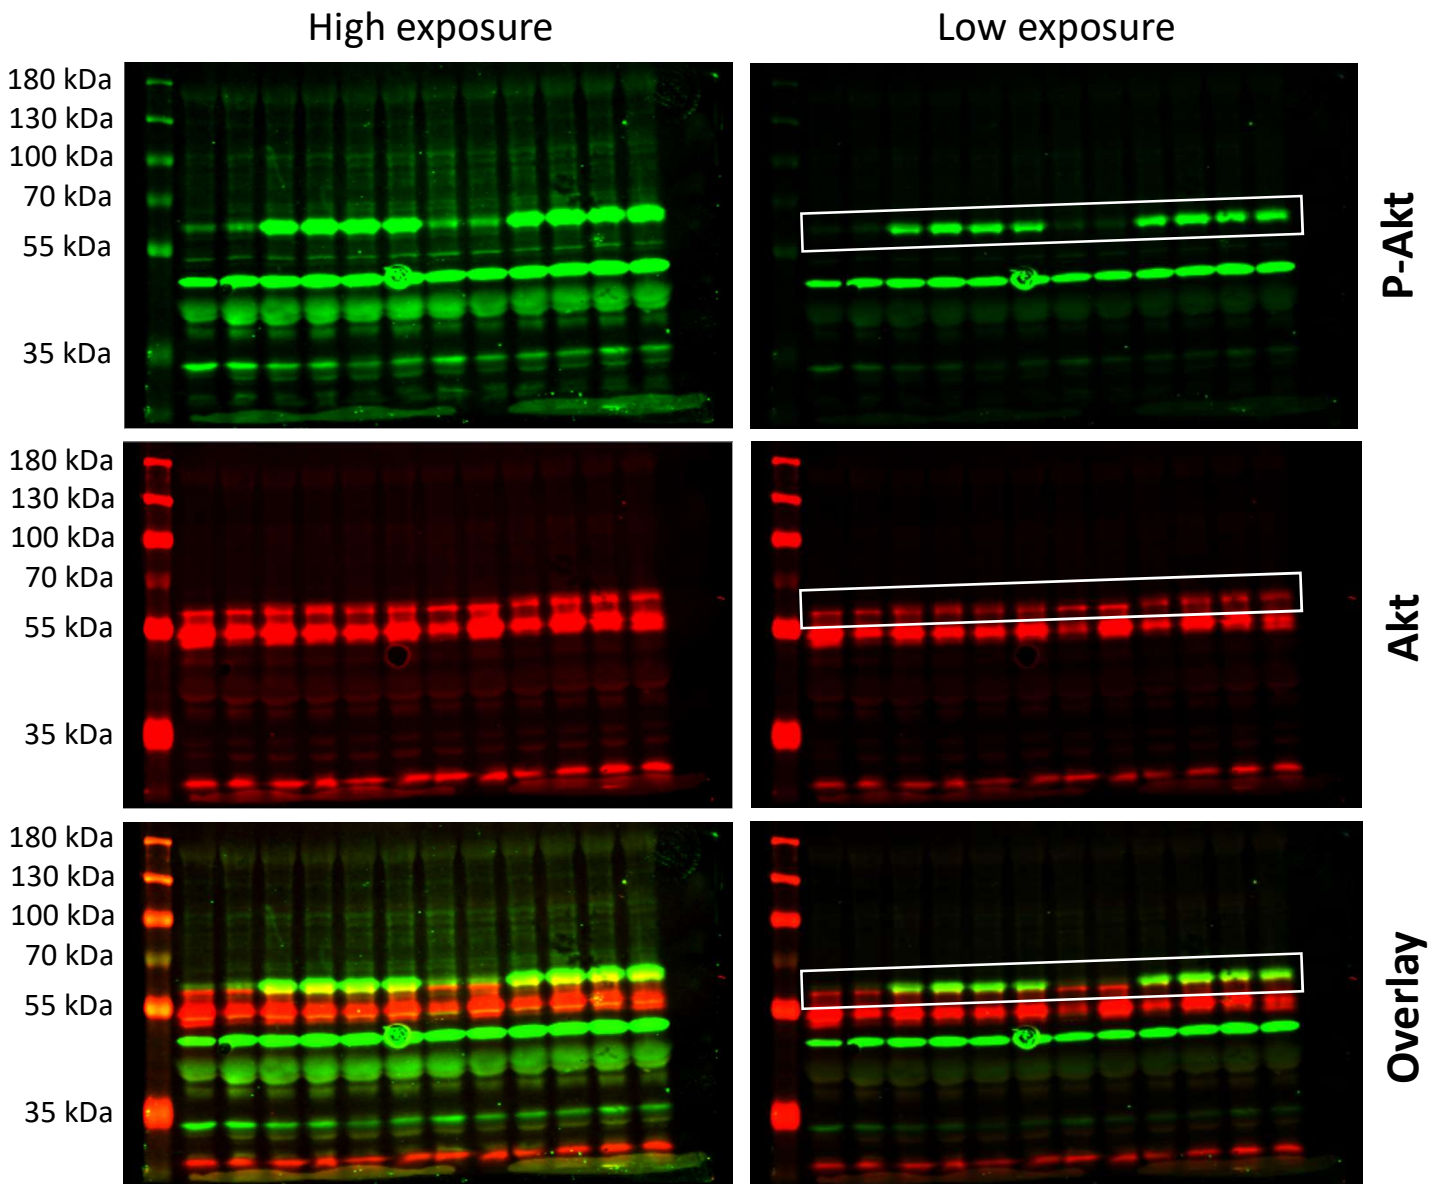

**Figure S7:** Uncropped WB images for muscle (related to Fig. 2H)

Akt molecular weight: 60kDa

Rabbit monoclonal anti-phospho-Akt (Ser473) (Clone 193H12) (Cell Signaling, #4058)

Mouse monoclonal anti-Akt (Pan) (Clone 40D4) (Cell Signaling, #2920)



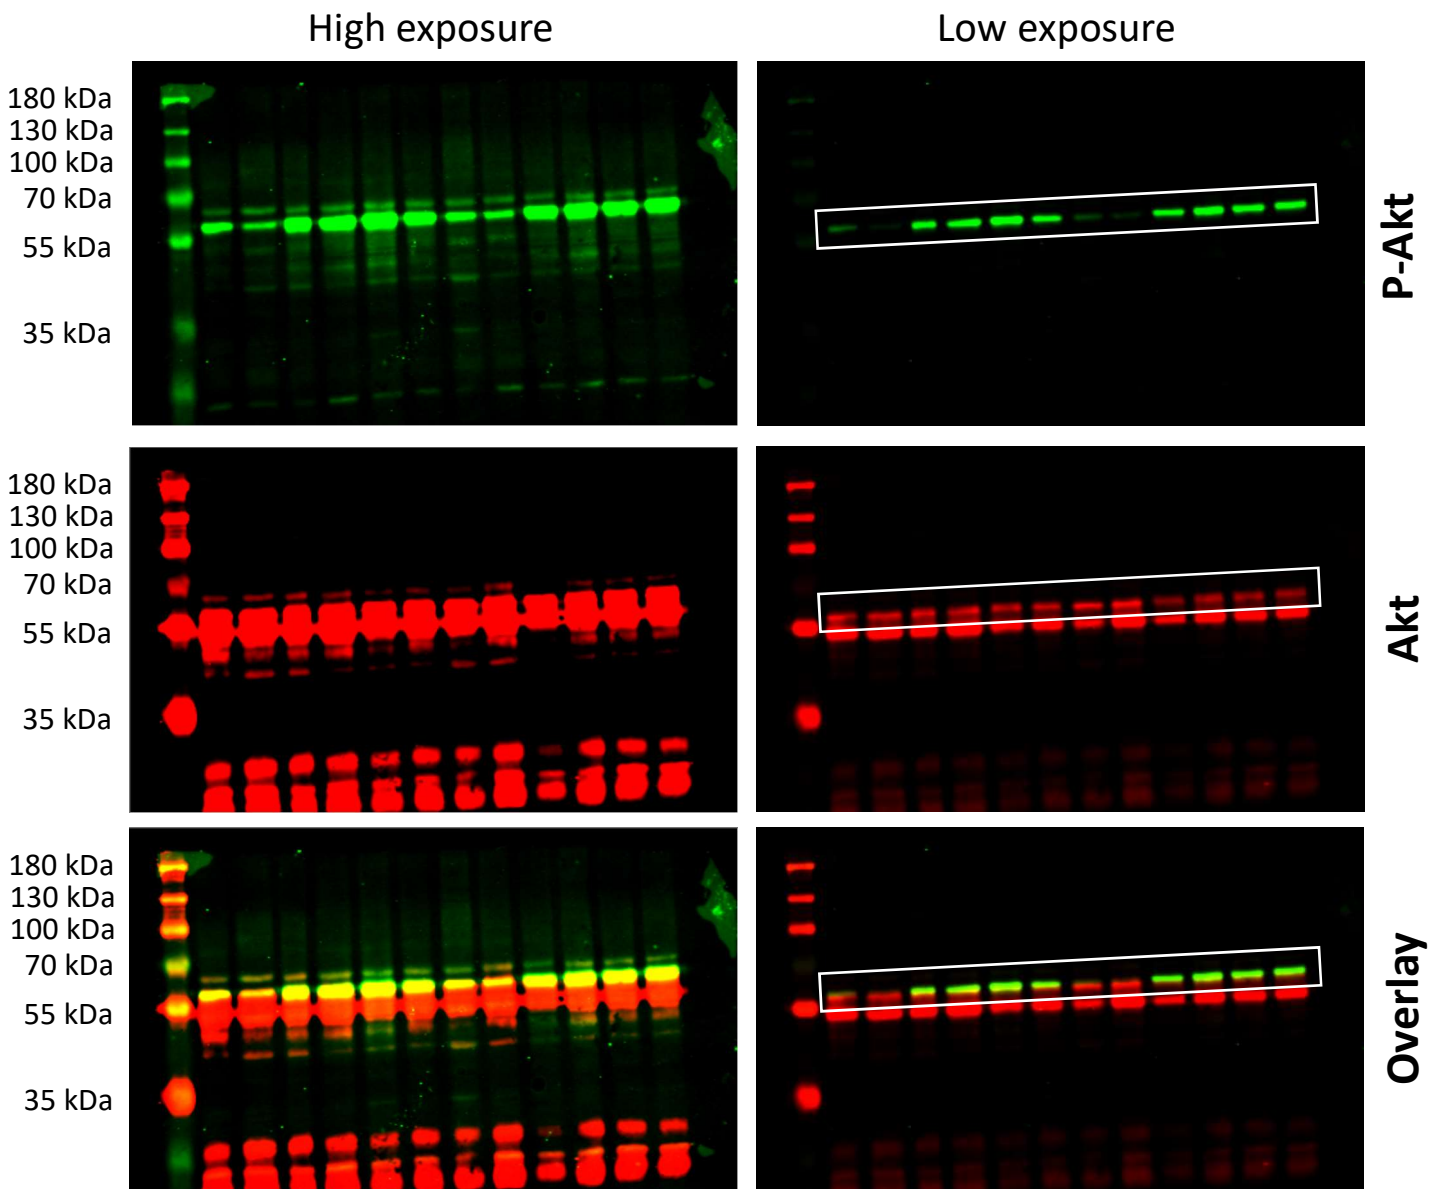

**Figure S8:** Uncropped WB images for epiAT (related to Fig. 2H)

Akt molecular weight: 60kDa

Rabbit monoclonal anti-phospho-Akt (Ser473) (Clone 193H12) (Cell Signaling, #4058)

Mouse monoclonal anti-Akt (Pan) (Clone 40D4) (Cell Signaling, #2920)

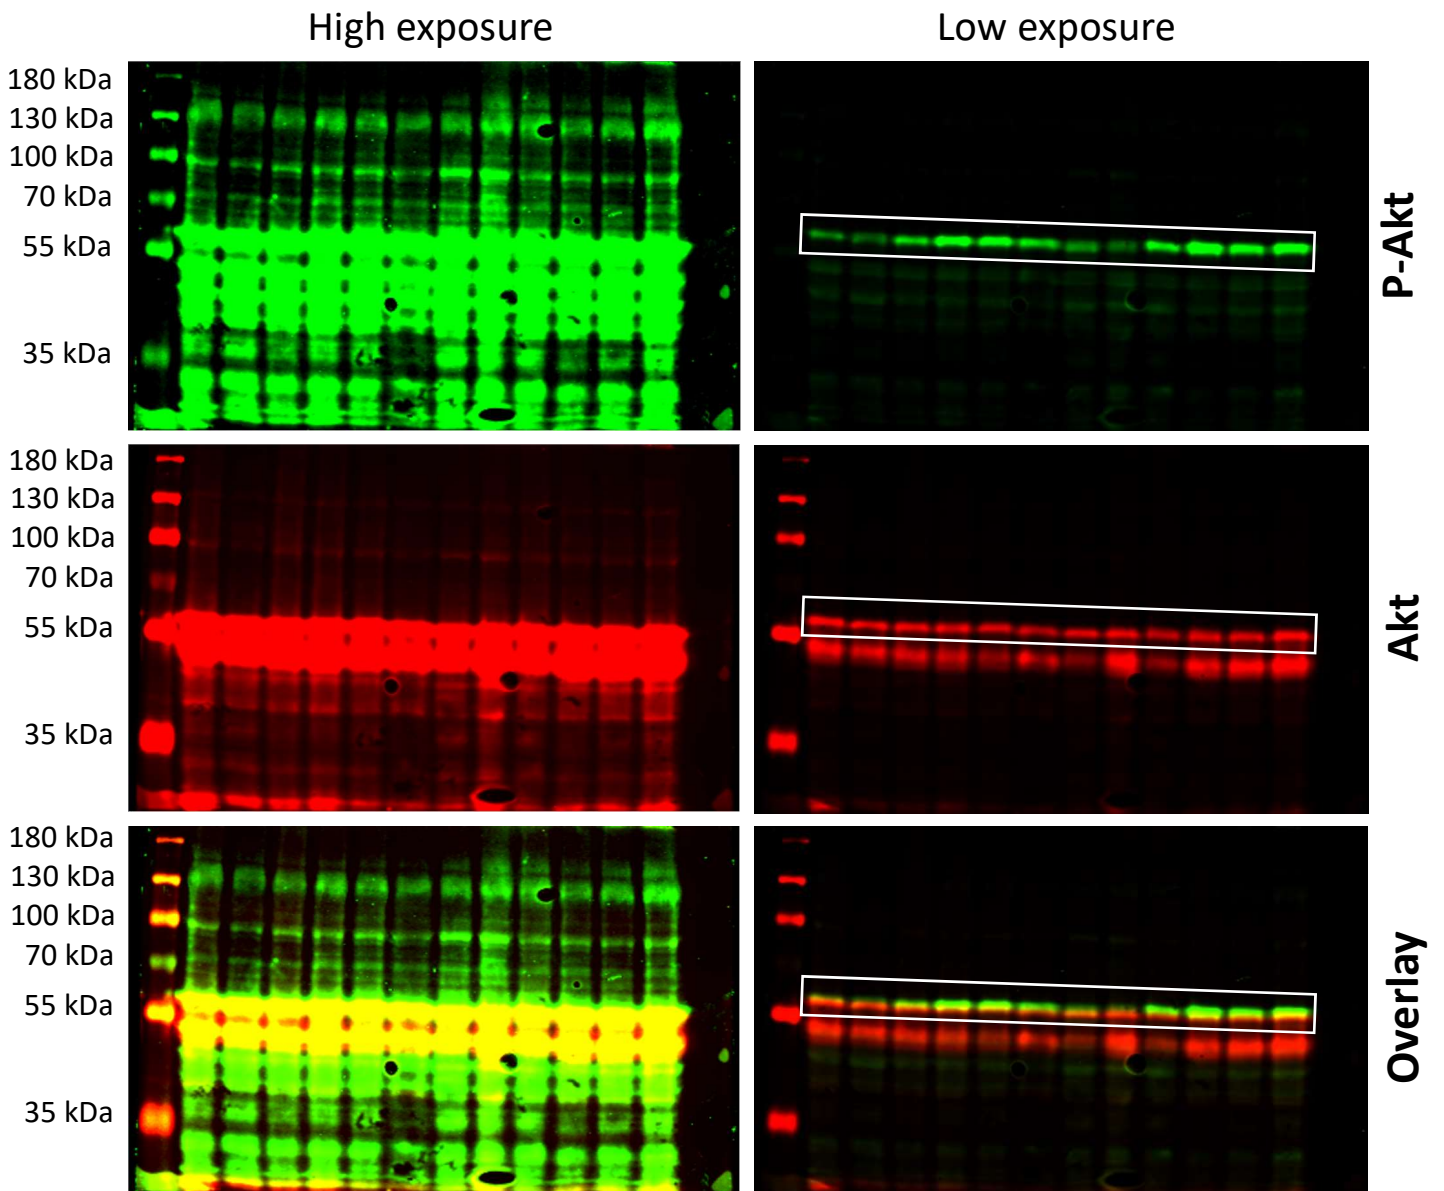

**Figure S9:** Uncropped WB images for liver (related to Fig. 2H)

Akt molecular weight: 60kDa

Rabbit monoclonal anti-phospho-Akt (Ser473) (Clone 193H12) (Cell Signaling, #4058)

Mouse monoclonal anti-Akt (Pan) (Clone 40D4) (Cell Signaling, #2920)

**Supplementary Table 1** : Primers

|                       | Forward                      | Reverse                      |
|-----------------------|------------------------------|------------------------------|
| <b>Genotyping</b>     |                              |                              |
| <i>Rora</i><br>(PCR1) | CATGCATACACCCACACACATCACAACC | CTTGATGCACTGATGTAATAACATATCC |
| <i>Lyz2</i>           | CTTGGGCTGCCAGAATTTCTC        | TTACAGTCGGCCAGGCTGAC         |
| <i>Cre</i>            | CTTGGGCTGCCAGAATTTCTC        | CCCAGAAATGCCAGATTACG         |
| <b>Excision</b>       |                              |                              |
| <i>Rora</i><br>(PCR2) | CATGCATACACCCACACACATCACAACC | CAGCCGTGTGAAACTTACGGGAAATACC |
| <b>qPCR</b>           |                              |                              |
| <i>Rplp0</i>          | GGGAAGGTGTAATCAGTCTCCACAG    | CATGCTGAACATCTCCCCCTTCTCC    |
| <i>Ppia</i>           | GCATACGGGTCTTGGCATCTTGTC     | ATGGTGATCTTCTTGCTGGTCTTGC    |
| <i>Rpl4</i>           | CTGAACCCTTACGCCAAGAC         | CCTTCTCGGATTTGGTTGCC         |
| <i>Rps29</i>          | GATCCGCAAATACGGGCTG          | CCATTCAAGGTCGCTTAGTCC        |
| <i>Rora</i> Exon<br>3 | TTCCATGCAAGATCTGTGGAGAC      | TGCAGCCTTCACACGTAAT          |
| <i>Rorb</i>           | CCCACACCTACGAGGAAATCAA       | CATGAAGCCTGTTATCCGCTTG       |
| <i>Rorc</i>           | GGTACCATATGCCTCTCTGA         | ATCTCCCACATTGACTTCT          |
| <i>Lyz2</i>           | CAATGTGCAAAGAGGGTGGTG        | TAGAGGGGAAATCGAGGGAATG       |
| <i>Cre</i>            | CCTGGAAAATGCTTCTGTCCG        | CAGGGTCTTATAAGCAATCCC        |
| <i>Arntl</i>          | GGACTTCGCCTCTACCTGTTC        | ACCCGATTTCCCCGTTCC           |
| <i>Ob</i>             | GGTGTGAAAGAACCTGAGCTGAGG     | CAGTGGATGCTAATGTGCCCTG       |
| <i>Tnf</i>            | AGCACAGAAAGCATGATCCG         | CCCGAAGTTCAGTAGACAGAAGAG     |
| <i>Il1b</i>           | GCCACCTTTTGACAGTGATGAG       | CCTGAAGCTCTTGTTGATGTGC       |
| <i>Il6</i>            | CCAGTTGCCTTCTTGGGACTG        | CAGGTCTGTTGGGAGTGGTATCC      |
| <i>Il10</i>           | AGGCGCTGTGCATCGATTTCTC       | TGGCCTTG TAGACACCTTGGTC      |
| <i>Col1a1</i>         | AGGCATAAAGGGTCATCGTGG        | GAGACCGTTGAGTCCGTCTTT        |
| <i>Col3a1</i>         | TGGCAATGTAAAGAAGTCTC         | CCCAGTGTGTTTAGTACAGC         |
| <i>Acta2</i>          | GCCGAGATCTCACCGACTAC         | CAATCTCACGCTCGGCAGTA         |
| <i>Cd19</i>           | ACCTGACCATCGAGAGGCACGTG      | CCTGGCGGGGTCAGTCATTTCGCTT    |
| <i>Cd3e</i>           | ACTGGAGCAAGAATAGGAAG         | GGATGGGCTCATAGTCTG           |
| <i>Adgre1</i>         | CTTTGGCTATGGGCTTCCAGTC       | GCAAGGAGGACAGAGTTTATCGTG     |
| <i>Clec4f</i>         | CCCAGGACCCTGCGGCACGTC        | CCGAAGCAGGAGGGAGGGAGGCTC     |
| <i>Ly6g</i>           | TGATGGATTTTGC GTTGCTCTG      | GTATTGTCCAGAGTAGTGGGGC       |
| <i>Ccr2</i>           | ATTCTCCACACCCTGTTTCG         | CATGGCCTGGTCTAAGTGCT         |

**Supplementary Table 2** : Antibodies for cell sorting

|                                                       | <u>Source</u>  | <u>Identifier</u> |
|-------------------------------------------------------|----------------|-------------------|
| <b>Spleen</b>                                         |                |                   |
| BV510Anti-CD45 (Clone 30-F11)                         | BioLegend      | #103137           |
| PE-CF594 Anti-CD3e (Clone 145-2C11)                   | BD Biosciences | #562286           |
| PE-CF594 Anti-TCR $\beta$ Chain (Clone H57-597)       | BD Biosciences | #562841           |
| PE-CF594 Anti-CD19 (Clone 1D3)                        | BD Biosciences | #562291           |
| BUV395 Anti-CD11b (Clone M1/70)                       | BD Biosciences | #563553           |
| BV421 Anti-Ly-6G (Clone 1A8)                          | BioLegend      | #127627           |
| PE/Cy7 Anti-F4/80 (Clone BM8)                         | BioLegend      | #123113           |
| FITC Anti-I-A/I-E (MHC class II) (Clone M5/114.15.2)  | BioLegend      | #107605           |
| PE Anti-CD115 (CSF-1R) (Clone AFS98)                  | BioLegend      | #135505           |
| APC/Cy7 Anti-CD11c (Clone N418)                       | BioLegend      | #117323           |
| <b>Liver</b>                                          |                |                   |
| BV510 Anti-CD45 (Clone 30-F11)                        | BioLegend      | #103137           |
| APC Anti-CD3e (Clone 145-2C11)                        | BD Biosciences | #553066           |
| APC Anti-TCR $\beta$ Chain (Clone H57-597)            | BD Biosciences | #553174           |
| PE Anti-CD19 (Clone 1D3)                              | BD Biosciences | #557399           |
| PE Anti-CD20 (Clone AISB12)                           | eBioscience    | #12-0201-82       |
| AF700 Anti-I-A/I-E (MHC class II) (Clone M5/114.15.2) | BioLegend      | #107622           |
| AF488 Anti-F4/80 (Clone BM8)                          | BioLegend      | #123120           |
| Anti-CLEC4F/CLECSF13 (Clone 370901)*                  | Bio-Techne     | #MAB2784          |
| <b>Adipose tissue</b>                                 |                |                   |
| BV510 Anti-CD45 (Clone 30-F11)                        | BioLegend      | #103137           |
| APC Anti-CD3e (Clone 145-2C11)                        | BD Biosciences | #553066           |
| APC Anti-TCR $\beta$ Chain (Clone H57-597)            | BD Biosciences | #553174           |
| PE Anti-CD19 (Clone 1D3)                              | BD Biosciences | #557399           |
| PE Anti-CD20 (Clone AISB12)                           | eBioscience    | #12-0201-82       |
| AF700 Anti-I-A/I-E (MHC class II) (Clone M5/114.15.2) | BioLegend      | #107622           |
| AF488 Anti-F4/80 (Clone BM8)                          | BioLegend      | #123120           |
| BV711 Anti-CD64 (Fc $\gamma$ RI) (Clone X54-5/7.1)    | BioLegend      | #139311           |
| <b>Lung</b>                                           |                |                   |
| BV510 Anti-CD45 (Clone 30-F11)                        | BioLegend      | #103137           |
| PE-CF594 Anti-CD3e (Clone 145-2C11)                   | BD Biosciences | #562286           |
| PE-CF594 Anti-TCR $\beta$ Chain (Clone H57-597)       | BD Biosciences | #562841           |
| PE-CF594 Anti-CD19 (Clone 1D3)                        | BD Biosciences | #562291           |
| PE/Cy7 Anti-F4/80 (Clone BM8)                         | BioLegend      | #123114           |
| BV711 Anti-CD64 (Fc $\gamma$ RI) (Clone X54-5/7.1)    | BioLegend      | #139311           |
| BUV395 Anti-CD11b (Clone M1/70)                       | BD Biosciences | #563553           |
| AF647 Anti-Siglec-F (Clone E50-2440)                  | BD Biosciences | #562680           |

\* Anti-CLEC4F antibody was coupled with PE/Cy7 by using PE/Cy7 Conjugation Kit - Lightning-Link (Abcam, #ab102903).
